# Supplementary material for: Competence-induced protein Ccs4 facilitates pneumococcal invasion into brain tissue and virulence in meningitis
Source: PubMed Central journal article supplement (PMC6177246; doi:10.1080/21505594.2018.1526530), 2018-09-25
Supplement: kvir-09-01-1526530-s001.pdf [file kvir-09-01-1526530-s001.pdf]

## **Supplementary Information**

### **Competence-induced protein Ccs4 facilitates pneumococcal invasion into brain tissue and virulence in meningitis**

Yujiro Hirose<sup>a</sup>, Masaya Yamaguchi<sup>a, \*</sup>, Kana Goto<sup>a</sup>, Tomoko Sumitomo<sup>a</sup>, Masanobu Nakata<sup>a</sup>, Shigetada Kawabata<sup>a</sup>

<sup>a</sup>Department of Oral and Molecular Microbiology, Osaka University Graduate School of Dentistry, Suita, Osaka 565-0871, Japan

\*Address correspondence to: Masaya Yamaguchi, [yamaguchi@dent.osaka-u.ac.jp](mailto:yamaguchi@dent.osaka-u.ac.jp)

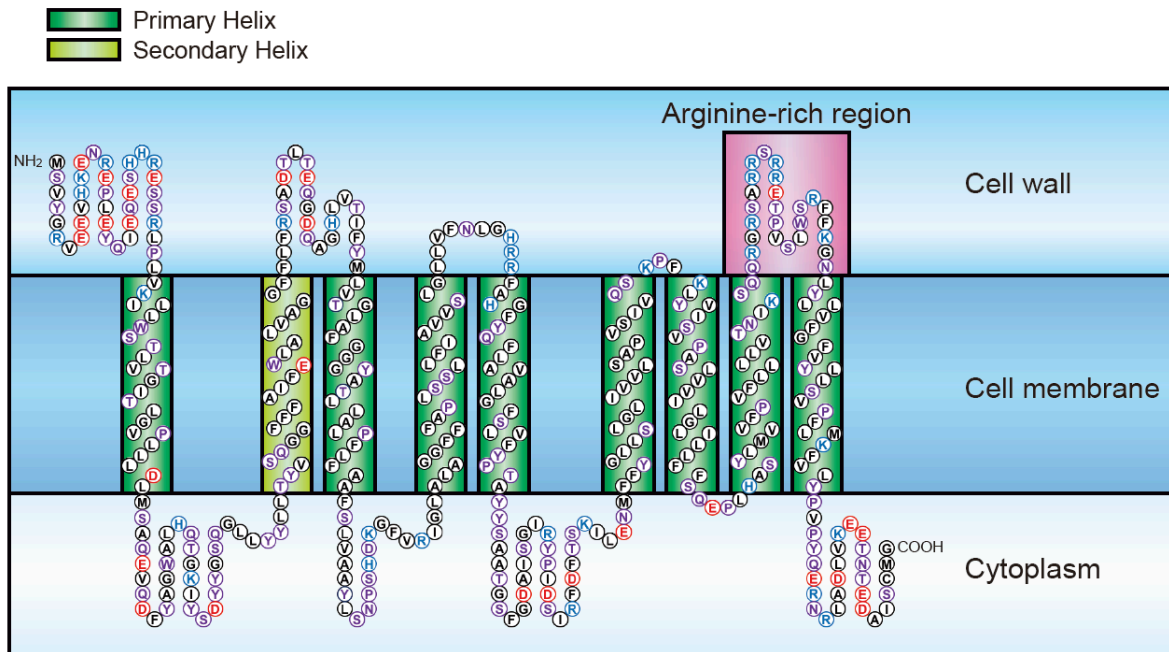

**Figure S1. Deduced transmembrane topology of Ccs4.** Transmembrane regions of Ccs4 were predicted using the SOSUI algorithm. Pink-shaded area indicates extracellular region with an arginine-rich region (-RFRRSARSRRS-).

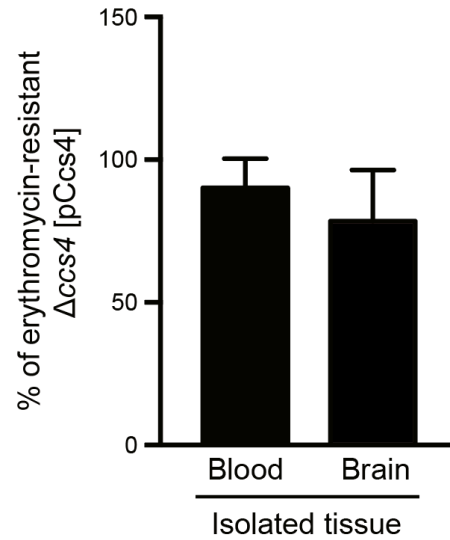

**Figure S2. The percentage of  $\Delta ccs4$  containing Ccs4-expressing vector in blood and brain homogenates.** In the intravenous infection model, we counted CFU in blood and brain homogenates which isolated from complement strain-infected mice on THY agar with or without erythromycin (n = 18). The percentage of erythromycin-resistant  $\Delta ccs4$  [pCcs4] = (CFU counts on THY ager with erythromycin / CFU counts on THY ager without erythromycin)  $\times$  100.

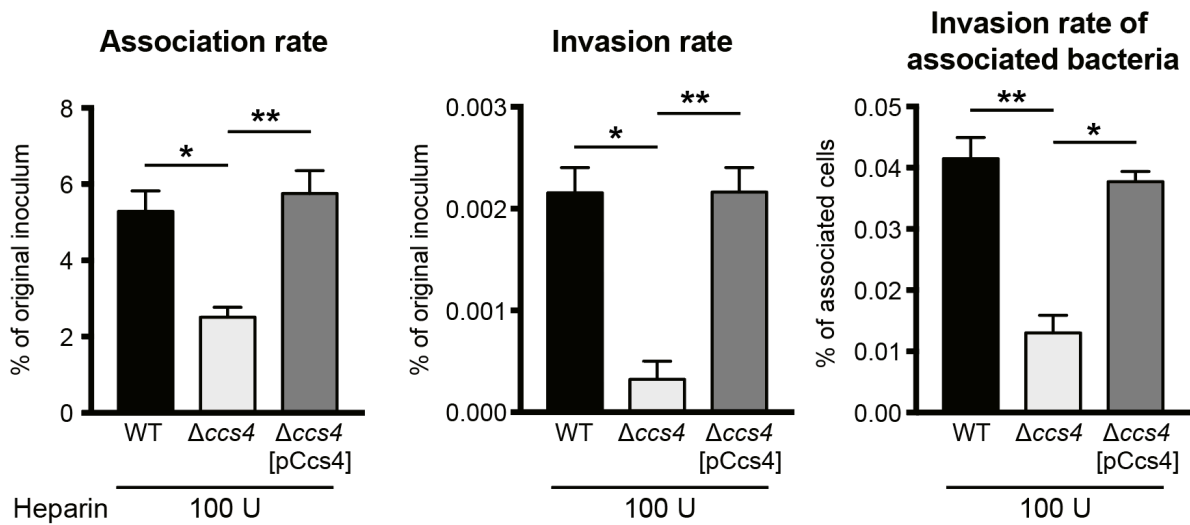

**Figure S3. Effects of heparin pretreatment on association with and invasion into hBMECs by *S. pneumoniae*.** Association rates were calculated by dividing the CFU value obtained at 1 hour after infection by the value for the original inoculum. Invasion rates were calculated by dividing the CFU value obtained at 1 hour after antibiotic addition by the value for the original inoculum. Values are presented as the mean of 6 wells from one of 3 independent experiments. Vertical lines represent the mean +S.E. Statistical differences between groups were analyzed using a Kruskal-Wallis test with Dunn's post hoc test. \* $p < 0.05$  and \*\* $p < 0.01$ .

## **Materials and Methods**

### **Similarity search**

We searched for proteins similar to Ccs4 of *S. pneumoniae* TIGR4 using the BLASTP program (NCBI BLAST). Proteins with an E-value  $<2E-100$ , coverage of the query  $>99\%$ , and identity  $>40\%$  are listed. Evaluation criteria for capsule +/- were used as presented in literature or based on the existence of *cpsA-cpsD* encoding a putative polysaccharide capsule in *S. pneumoniae* TIGR4.

Supplementary Table 1. List of proteins similar to *S. pneumoniae* TIGR4 Csa4

| Bacteria             | Strain                     | Accession number     | Protein ID         | Product                         | Query cover                     | E-value                         | Identity  | Capsule   | Serotype  |   |   |
|----------------------|----------------------------|----------------------|--------------------|---------------------------------|---------------------------------|---------------------------------|-----------|-----------|-----------|---|---|
| <i>S. pneumoniae</i> | TIGR4                      | AE005672.3           | AAK74380.1         | Competence-induced protein Csa4 | 100%                            | 0                               | 100%      | +         | 4         |   |   |
|                      | AP200                      | CP002121.1           | ADM83843.1         | Hypothetical protein            | 99%                             | 0                               | 100%      | +         | 11A, ST62 |   |   |
|                      | INV200                     | FQ312029.1           | CBW33819.1         | Puative membrane protein        | 99%                             | 0                               | 100%      | +         | 14        |   |   |
|                      | OXCI41                     | FQ312027.1           | CBW31886.1         | Puative membrane protein        | 99%                             | 0                               | 100%      | +         | 3         |   |   |
|                      | INV104                     | FQ312030.1           | CBW35848.1         | Puative membrane protein        | 99%                             | 0                               | 100%      | +         | 1         |   |   |
|                      | SPN034183                  | FQ312043.1           | CCP31941.1         | Puative membrane protein        | 99%                             | 0                               | 100%      | +         | 3         |   |   |
|                      | SPN994038                  | FQ312041.2           | CCP29955.1         | Puative membrane protein        | 99%                             | 0                               | 100%      | +         | 3         |   |   |
|                      | SPN994039                  | FQ312044.2           | CCP33914.1         | Competence-induced protein Csa4 | 99%                             | 0                               | 100%      | +         | 3         |   |   |
|                      | A66                        | LN847353.1           | CR160910.1         | Competence-induced protein Csa4 | 99%                             | 0                               | 100%      | +         | 3         |   |   |
|                      | NCTC7465                   | LN831051.1           | COT02612.1         | Competence-induced protein Csa4 | 99%                             | 0                               | 100%      | +         | 1         |   |   |
|                      | D39                        | CP000410.1           | ABJ53888.1         | Competence-induced protein Csa4 | 99%                             | 0                               | 99%       | +         | 2         |   |   |
|                      | R6                         | AE007317.1           | AAK98986.1         | Hypothetical protein            | 99%                             | 0                               | 99%       | -         | -         |   |   |
| <i>S. pneumoniae</i> | CGSP14                     | CP001033.1           | ACB89463.1         | Competence-induced protein Csa4 | 99%                             | 0                               | 99%       | +         | 14        |   |   |
|                      | Hungary19A-6               | CP000936.1           | ACA36557.1         | Competence-induced protein Csa4 | 99%                             | 0                               | 99%       | +         | 19A       |   |   |
|                      | ST1556                     | CP003357.1           | AFG93944.2         | Damage-inducible protein CmaA   | 99%                             | 0                               | 99%       | +         | 19F       |   |   |
|                      | Taiwan19F-14               | CP000921.1           | ACO24255.1         | Competence-induced protein Csa4 | 99%                             | 0                               | 99%       | +         | 19F       |   |   |
|                      | SPNA45                     | CP000936.1           | CCM00114.1         | Puative membrane protein        | 99%                             | 0                               | 99%       | +         | 3         |   |   |
|                      | G54                        | CP001015.1           | ACF56587.1         | Hypothetical protein            | 99%                             | 0                               | 99%       | +         | 19F       |   |   |
|                      | gamPN10373                 | CP001845.1           | AFS42337.1         | Competence-induced protein Csa4 | 99%                             | 0                               | 99%       | +         | 1         |   |   |
|                      | TCH8431/19A                | CP001993.1           | ADJ68742.1         | Competence-induced protein Csa4 | 99%                             | 0                               | 99%       | +         | 19A       |   |   |
|                      | ATCC700669                 | FM211187.1           | CAR68052.1         | Puative membrane protein        | 99%                             | 0                               | 99%       | +         | 23F       |   |   |
|                      | P1031                      | CP000920.1           | AC020493.1         | Competence-induced protein Csa4 | 99%                             | 0                               | 99%       | +         | 1         |   |   |
|                      | 70585                      | CP000918.1           | ACO17022.1         | Competence-induced protein Csa4 | 99%                             | 0                               | 99%       | +         | 5         |   |   |
|                      | 670-6B                     | CP002176.1           | ADM90353.1         | Competence-induced protein Csa4 | 99%                             | 0                               | 99%       | +         | 6B        |   |   |
| <i>S. pneumoniae</i> | NT_110_58                  | CP007593.1           | ADJ71143.1         | Hypothetical protein            | 99%                             | 0                               | 99%       | -         | -         |   |   |
|                      | JJA                        | CP000919.1           | ACO18425.1         | Competence-induced protein Csa4 | 99%                             | 0                               | 99%       | +         | 19F       |   |   |
|                      | SPN034156                  | FQ312045.1           | CCP36950.1         | Puative membrane protein        | 99%                             | 0                               | 99%       | +         | 3         |   |   |
|                      | <i>S. pseudopneumoniae</i> | IST493               | CP002925.1         | Competence-induced protein Csa4 | 99%                             | 0                               | 96%       | -         | -         |   |   |
|                      | <i>S. mitis</i>            | B6                   | FN568063.1         | CBJ23149.1                      | Competence-induced protein Csa4 | 99%                             | 0         | 91%       | -         | - |   |
|                      |                            | KCOM 1350            | CP012646.1         | ALD67418.1                      | Damage-inducible protein CmaA   | 99%                             | 6.00E-133 | 54%       | -         | - |   |
|                      |                            | SVGS_061             | CP014326.1         | AMH89424.1                      | Damage-inducible protein CmaA   | 99%                             | 4.00E-124 | 53%       | +         | - |   |
|                      |                            | Uo5                  | FR720602.1         | CBZ201433.1                     | Competence-induced protein Csa4 | 99%                             | 1.00E-108 | 48%       | +         | - |   |
|                      |                            | <i>S. pneumoniae</i> | S.MIT/ORA/LLIS-351 | CP019562.1                      | AQA08377.1                      | Puative membrane protein        | 99%       | 1.00E-108 | 49%       | + | - |
|                      |                            |                      | DORA_23_24         | AZMK61000719.1                  | ETJ06019.1                      | Competence-induced protein Csa4 | 99%       | 1.00E-132 | 48%       | - | - |

(E-value &lt; 2E-100, Coverage of the query &gt; 99%, Identity &gt; 48%)
